# Supplementary material for: Autonomous replication sequences from the Amaranthus palmeri eccDNA replicon enable replication in yeast
Source: BMC Res Notes. 2020 Jul 10;13:330. doi: 10.1186/s13104-020-05169-0 (PMC7350638; doi:10.1186/s13104-020-05169-0)
Supplement: Supplementary file 3 — Additional file 3: Table S1. DNA curvature results of a 256 bp window of sequence extracted from the eccDNA replicon that harbors 2 DNA unwinding elements (DUE) and the extended autonomous consensus sequence (EACS) with homology to yeast. [file 13104_2020_5169_MOESM3_ESM.xlsx]

## Sheet: Sheet1
Table S1. DNA curvature result of a 256bp window of sequence extracted from the eccDNA replicon that harbors 2 DNA unwinding elements (DUE) and the extended autonomous consensus sequence (EACS) with homology to yeast.
Sequence	Index	Curvature / 0.0234 [10]	Bend Angle / 2.3728 [2]	Curvature Angle / 2.3728 [15]	Helix Axis [x]	Helix Axis [y]	Helix Axis [z]	Phosphate 1 [x]	Phosphate 1 [y]	Phosphate 1 [z]	Phosphate 2 [x]	Phosphate 2 [y]	Phosphate 2 [z]	Basepair Normal [x]	Basepair Normal [y]	Basepair Normal [z]	Smoothed Normal [x]	Smoothed Normal [y]	Smoothed Normal [z]
C	1	0	0	0	-346.647	-17.5287	-90.6124	-345.336	-26.57	-90.1121	-346.55	-8.47099	-91.9021	-0.45637	-0.3417	-0.82156	-0.26005	-0.2373	-0.415
C	2	0	0	0	-345.105	-16.3737	-87.8355	-339.96	-23.5468	-90.2418	-349.234	-8.34552	-86.3489	-0.45637	-0.3417	-0.82156	-0.30035	-0.30502	-0.47657
T	3	0	0.12234	0	-343.562	-15.2188	-85.0586	-336.759	-19.1759	-89.7239	-349.94	-9.92159	-81.1875	-0.45637	-0.3417	-0.82156	-0.34064	-0.37274	-0.53813
T	4	0	0.16852	0	-341.787	-13.7304	-82.5974	-336.16	-13.2594	-89.7969	-347.938	-12.7563	-75.8939	-0.5252	-0.44036	-0.72818	-0.38094	-0.44045	-0.5997
T	5	0	0.16852	0	-340.081	-11.8072	-80.4029	-338.28	-7.86579	-88.4611	-343.125	-14.7192	-72.2808	-0.50472	-0.56897	-0.64925	-0.42123	-0.50817	-0.66127
T	6	0	0.12234	0	-338.719	-9.51841	-78.3218	-341.893	-4.42322	-85.2269	-336.994	-14.3572	-70.7506	-0.40295	-0.67717	-0.61569	-0.45203	-0.56337	-0.69158
C	7	0	0.06424	0	-337.357	-7.22958	-76.2408	-344.754	-2.93991	-79.496	-330.943	-12.011	-71.8018	-0.40295	-0.67717	-0.61569	-0.4582	-0.58742	-0.66708
T	8	0	0	0	-335.995	-4.94074	-74.1598	-344.893	-2.81144	-74.0568	-327.454	-8.00835	-72.9975	-0.40295	-0.67717	-0.61569	-0.46378	-0.61058	-0.64195
C	9	0	0.06424	0	-334.633	-2.65191	-72.0787	-342.662	-4.54547	-68.12	-326.029	-1.9466	-75.1077	-0.40295	-0.67717	-0.61569	-0.46616	-0.629	-0.62214
A	10	0	0.06424	0	-333.271	-0.36308	-69.9977	-337.857	-5.87463	-64.3133	-327.44	4.15797	-75.4081	-0.40295	-0.67717	-0.61569	-0.46726	-0.63749	-0.6126
A	11	0.05352	0.06424	0	-331.475	1.65421	-67.966	-331.652	-6.27233	-63.3995	-329.931	9.01359	-73.1784	-0.53149	-0.59683	-0.60109	-0.47501	-0.63481	-0.60941
C	12	0.06754	0.06424	0	-329.678	3.6715	-65.9343	-325.786	-4.51724	-64.7055	-332.468	12.0505	-68.3274	-0.53149	-0.59683	-0.60109	-0.48113	-0.62888	-0.61076
T	13	0.13309	0	0	-327.882	5.68878	-63.9026	-321.934	-0.9198	-66.0609	-333.23	13.0617	-63.0342	-0.53149	-0.59683	-0.60109	-0.48054	-0.62519	-0.61499
A	14	0.18191	0	0	-326.086	7.70607	-61.8709	-319.907	4.89841	-68.007	-332.501	11.7472	-56.7502	-0.53149	-0.59683	-0.60109	-0.47994	-0.62148	-0.61921
T	15	0.21644	0.06424	0	-324.289	9.72336	-59.8392	-320.215	10.7911	-67.9619	-329.269	9.91488	-52.1659	-0.53149	-0.59683	-0.60109	-0.48127	-0.61179	-0.62777
A	16	0.23349	0.06424	0.46206	-322.493	11.7406	-57.8075	-322.635	16.3443	-65.7133	-323.686	7.97611	-49.5541	-0.53149	-0.59683	-0.60109	-0.48337	-0.59476	-0.64235
A	17	0.28495	0.06424	0.4319	-321.151	13.9043	-55.5843	-325.841	19.3659	-61.2318	-317.826	8.40212	-49.0738	-0.39694	-0.64014	-0.65777	-0.49079	-0.5736	-0.65582
T	18	0.33995	0.07953	0.40407	-319.809	16.068	-53.361	-327.695	20.0882	-55.6767	-312.784	11.3652	-49.8616	-0.39694	-0.64014	-0.65777	-0.50991	-0.55062	-0.66092
A	19	0.39607	0.12222	0.37897	-318.468	18.2316	-51.1377	-327.431	18.7211	-49.3672	-309.492	16.5809	-51.7859	-0.39694	-0.64014	-0.65777	-0.53618	-0.53307	-0.65448
A	20	0.43497	0.16806	0.35704	-317.008	19.9772	-48.6385	-324.27	16.188	-44.5626	-308.964	22.4346	-52.2406	-0.43193	-0.51644	-0.73941	-0.56419	-0.51964	-0.64161
A	21	0.47961	0.1968	0.34726	-315.218	21.3284	-46.1093	-318.888	13.8608	-42.3035	-310.308	27.8276	-50.276	-0.5294	-0.39977	-0.74828	-0.5918	-0.5055	-0.62789
A	22	0.51044	0.1968	0.35694	-313.02	22.4663	-43.8081	-312.637	13.3873	-42.74	-312.194	31.3292	-45.9247	-0.65047	-0.33665	-0.68085	-0.62492	-0.48776	-0.60956
A	23	0.51278	0.16806	0.36346	-310.495	23.6569	-41.9018	-307.217	15.6764	-44.9473	-313.076	32.2628	-40.1715	-0.74687	-0.35226	-0.564	-0.66267	-0.46609	-0.5862
A	24	0.52072	0.12222	0.36824	-307.859	25.1453	-40.3999	-303.995	20.5349	-47.2945	-311.81	30.9759	-34.5598	-0.78016	-0.44037	-0.44433	-0.69855	-0.44345	-0.56158
T	25	0.5399	0.06424	0.36913	-305.222	26.6338	-38.8981	-302.683	26.2751	-47.6811	-308.361	28.4422	-30.4965	-0.78016	-0.44037	-0.44433	-0.7312	-0.42667	-0.53226
A	26	0.55854	0	0.36542	-302.585	28.1222	-37.3962	-303.021	32.3477	-45.4999	-303.112	25.0875	-28.7807	-0.78016	-0.44037	-0.44433	-0.75986	-0.41532	-0.50012
G	27	0.55606	0	0.3626	-299.948	29.6107	-35.8944	-303.051	36.0957	-41.5537	-297.839	23.7953	-29.1529	-0.78016	-0.44037	-0.44433	-0.78584	-0.40149	-0.47038
G	28	0.55261	0	0.363	-297.311	31.0991	-34.3925	-303.145	38.0259	-35.6949	-292.205	24.0167	-31.6571	-0.78016	-0.44037	-0.44433	-0.80671	-0.38545	-0.44792
G	29	0.54823	0.06424	0.36342	-294.674	32.5876	-32.8907	-301.826	37.3247	-29.7092	-287.74	26.9215	-34.769	-0.78016	-0.44037	-0.44433	-0.82591	-0.36267	-0.43167
A	30	0.54741	0.12222	0.36308	-292.037	34.076	-31.3888	-298.504	34.2824	-24.9198	-285.152	32.4583	-37.1933	-0.78016	-0.44037	-0.44433	-0.84906	-0.33559	-0.40802
A	31	0.54029	0.12222	0.36266	-289.222	35.0869	-29.814	-293.735	30.5299	-23.2881	-284.02	38.2188	-36.6582	-0.83274	-0.29909	-0.46592	-0.87298	-0.31011	-0.37648
A	32	0.51829	0.1684	0.35981	-286.18	35.7022	-28.4768	-288.422	27.5854	-24.8983	-283.246	42.9503	-33.2282	-0.90019	-0.18204	-0.39563	-0.8951	-0.28377	-0.34389
T	33	0.51285	0.16863	0.3512	-283.137	36.3175	-27.1395	-283.306	27.1944	-27.8141	-282.31	45.3944	-27.9394	-0.90019	-0.18204	-0.39563	-0.91526	-0.25673	-0.31045
T	34	0.48161	0.12234	0.34149	-279.907	36.7724	-26.2541	-279.54	29.5018	-31.7965	-280.026	44.9016	-22.0569	-0.95564	-0.1346	-0.26197	-0.93332	-0.22917	-0.27639
T	35	0.42501	0.12234	0.33328	-276.603	37.366	-25.8588	-277.145	34.2565	-34.4467	-276.243	41.9344	-17.9395	-0.97749	-0.17562	-0.11695	-0.94918	-0.20128	-0.24194
C	36	0.3672	0.06424	0.32495	-273.299	37.9596	-25.4635	-274.827	40.402	-34.1477	-272.09	37.0634	-16.4385	-0.97749	-0.17562	-0.11695	-0.96161	-0.18066	-0.20657
A	37	0.30881	0	0.31411	-269.995	38.5532	-25.0682	-272.637	45.2086	-30.7636	-267.684	32.9623	-18.2041	-0.97749	-0.17562	-0.11695	-0.9693	-0.17348	-0.17426
T	38	0.25063	0	0.301	-266.691	39.1467	-24.6729	-270.173	47.5151	-25.9233	-263.45	31.0691	-21.852	-0.97749	-0.17562	-0.11695	-0.97419	-0.17232	-0.1458
G	39	0.1938	0	0.28817	-263.387	39.7403	-24.2776	-267.293	47.0343	-20.3714	-259.543	31.8005	-26.7048	-0.97749	-0.17562	-0.11695	-0.97693	-0.17366	-0.12427
T	40	0.14037	0	0.27603	-260.084	40.3339	-23.8823	-263.756	43.8731	-16.2862	-256.272	35.441	-30.6087	-0.97749	-0.17562	-0.11695	-0.97749	-0.17562	-0.11695
G	41	0.09185	0	0.26508	-256.78	40.9275	-23.487	-259.643	39.3311	-14.9448	-253.626	40.9359	-32.0758	-0.97749	-0.17562	-0.11695	-0.97749	-0.17562	-0.11695
G	42	0.05515	0	0.25369	-253.476	41.5211	-23.0917	-255.264	35.3163	-16.6097	-251.346	46.4483	-30.5013	-0.97749	-0.17562	-0.11695	-0.97749	-0.17562	-0.11695
T	43	0.01923	0	0.24446	-250.172	42.1146	-22.6964	-250.95	33.2333	-20.6397	-249.12	50.4768	-26.2578	-0.97749	-0.17562	-0.11695	-0.97749	-0.17562	-0.11695
G	44	0.01923	0	0.23634	-246.868	42.7082	-22.3011	-247.074	34.1343	-25.4887	-246.552	51.7054	-20.6683	-0.97749	-0.17562	-0.11695	-0.97749	-0.17562	-0.11695
A	45	0.03851	0	0.22385	-243.564	43.3018	-21.9058	-243.87	38.2285	-29.5139	-243.363	49.6337	-15.3042	-0.97749	-0.17562	-0.11695	-0.97749	-0.17562	-0.11695
C	46	0.05782	0	0.2095	-240.26	43.8954	-21.5105	-241.288	43.8268	-30.6019	-239.502	45.5514	-12.544	-0.97749	-0.17562	-0.11695	-0.97749	-0.17562	-0.11695
C	47	0.0761	0	0.19493	-236.956	44.489	-21.1152	-239.033	49.2308	-28.6594	-235.219	41.1183	-12.7884	-0.97749	-0.17562	-0.11695	-0.97749	-0.17562	-0.11695
C	48	0.09734	0	0.18107	-233.652	45.0825	-20.7199	-236.764	52.9214	-24.2673	-230.836	37.9388	-15.745	-0.97749	-0.17562	-0.11695	-0.97749	-0.17562	-0.11695
T	49	0.11996	0	0.16912	-230.348	45.6761	-20.3246	-234.052	54.0174	-19.6775	-226.827	37.2855	-19.3678	-0.97749	-0.17562	-0.11695	-0.97906	-0.16909	-0.1134
G	50	0.1433	0	0.15961	-227.044	46.2697	-19.9293	-230.943	52.4761	-14.4522	-223.134	39.1225	-24.0937	-0.97749	-0.17562	-0.11695	-0.98203	-0.15598	-0.10626
A	51	0.16701	0	0.15588	-223.741	46.8633	-19.534	-227.123	48.265	-11.1492	-220.144	43.9396	-27.4225	-0.97749	-0.17562	-0.11695	-0.98478	-0.14282	-0.09909
G	52	0.18052	0.06424	0.1607	-220.437	47.4569	-19.1387	-223.057	44.6623	-10.8297	-217.504	48.69	-27.7174	-0.97749	-0.17562	-0.11695	-0.98719	-0.13441	-0.08596
T	53	0.1983	0.06424	0.16696	-217.133	48.0504	-18.7434	-218.641	40.919	-13.2134	-215.29	54.0632	-25.3892	-0.97749	-0.17562	-0.11695	-0.98916	-0.13074	-0.06685
T	54	0.19897	0.06424	0.16965	-213.759	48.1964	-18.5925	-215.484	39.2329	-17.9627	-211.952	56.8867	-20.812	-0.99807	-0.04318	-0.04464	-0.99075	-0.12702	-0.04769
C	55	0.20218	0.08236	0.17023	-210.386	48.3424	-18.4416	-211.924	40.7327	-23.2833	-208.815	56.6884	-15.037	-0.99807	-0.04318	-0.04464	-0.99197	-0.12325	-0.02849
T	56	0.2079	0.06424	0.17023	-207.012	48.4883	-18.2907	-208.551	43.9549	-26.0878	-205.489	54.3411	-11.4251	-0.99807	-0.04318	-0.04464	-0.9928	-0.11943	-0.00928
T	57	0.22704	0.06424	0.17023	-203.674	48.9542	-18.5416	-206.497	49.4174	-27.2322	-201.073	50.0906	-9.84335	-0.98767	-0.13783	0.0742	-0.99373	-0.11177	0.0033
G	58	0.25969	0.06424	0.17023	-200.336	49.42	-18.7923	-203.683	54.7318	-25.4478	-197.104	45.4317	-11.2184	-0.98767	-0.13783	0.0742	-0.99561	-0.09343	0.00614
G	59	0.30114	0	0.16705	-196.997	49.8859	-19.0432	-200.418	58.0406	-21.3919	-193.549	42.3345	-15.1965	-0.98767	-0.13783	0.0742	-0.99771	-0.06751	0.00384
C	60	0.34769	0.06424	0.16067	-193.659	50.3518	-19.2939	-196.579	58.1858	-15.577	-190.556	42.0275	-21.483	-0.98767	-0.13783	0.0742	-0.99917	-0.04072	-0.00051
T	61	0.39683	0.12234	0.15429	-190.321	50.8176	-19.5448	-192.633	56.1152	-12.4523	-187.765	44.3782	-25.5212	-0.98767	-0.13783	0.0742	-0.99989	-0.0137	-0.00489
T	62	0.41981	0.16852	0.14906	-186.953	51.0275	-19.35	-189.568	51.3714	-10.589	-184.251	49.0883	-27.8739	-0.99641	-0.06209	-0.05763	-0.99971	0.01831	-0.01533
T	63	0.40607	0.16852	0.14801	-183.607	50.7679	-18.9453	-186.933	46.1717	-11.7672	-180.302	53.9315	-26.8687	-0.98983	0.0768	-0.11973	-0.99797	0.05516	-0.03181
T	64	0.3734	0.12234	0.14773	-180.327	50.0093	-18.6485	-184.493	42.4215	-15.6847	-176.196	56.8795	-23.0588	-0.97052	0.22444	-0.0878	-0.9946	0.09187	-0.04821
C	65	0.34017	0.06424	0.14901	-177.046	49.2507	-18.3518	-180.782	41.3297	-21.0012	-173.106	57.4389	-17.282	-0.97052	0.22444	-0.0878	-0.98965	0.12824	-0.06446
C	66	0.30649	0	0.15442	-173.766	48.4921	-18.055	-176.498	43.2219	-25.0175	-170.68	54.8445	-12.238	-0.97052	0.22444	-0.0878	-0.98315	0.16412	-0.08047
A	67	0.25559	0	0.16353	-170.486	47.7335	-17.7583	-171.945	47.1638	-26.7727	-168.643	49.8424	-9.04788	-0.97052	0.22444	-0.0878	-0.97651	0.1959	-0.08973
C	68	0.20446	0	0.17657	-167.205	46.9749	-17.4615	-167.591	51.4568	-25.4288	-166.541	43.9487	-8.85251	-0.97052	0.22444	-0.0878	-0.97203	0.21718	-0.08944
G	69	0.13651	0	0.19317	-163.925	46.2163	-17.1648	-163.834	53.9933	-21.984	-163.909	39.4052	-11.0555	-0.97052	0.22444	-0.0878	-0.97052	0.22444	-0.0878
T	70	0.06904	0	0.21273	-160.645	45.4577	-16.868	-160.697	54.6032	-16.6005	-160.716	36.4071	-15.5279	-0.97052	0.22444	-0.0878	-0.97052	0.22444	-0.0878
A	71	0.01066	0	0.23244	-157.364	44.6991	-16.5713	-158.299	52.0318	-11.1795	-156.746	36.5197	-20.6246	-0.97052	0.22444	-0.0878	-0.97052	0.22444	-0.0878
G	72	0.05648	0	0.24667	-154.084	43.9405	-16.2745	-156.005	48.0157	-8.3111	-152.548	38.4989	-23.468	-0.97052	0.22444	-0.0878	-0.97052	0.22444	-0.0878
T	73	0.08822	0	0.24901	-150.803	43.1819	-15.9778	-153.953	42.1643	-7.44805	-148.001	42.6307	-24.6702	-0.97052	0.22444	-0.0878	-0.97052	0.22444	-0.0878
A	74	0.10913	0	0.2443	-147.523	42.4233	-15.681	-151.53	36.6608	-9.81125	-143.695	46.9915	-22.6232	-0.97052	0.22444	-0.0878	-0.97205	0.21715	-0.08928
G	75	0.12609	0	0.23635	-144.243	41.6647	-15.3843	-148.399	33.8045	-13.2258	-140.084	48.944	-19.0497	-0.97052	0.22444	-0.0878	-0.97493	0.2025	-0.09223
A	76	0.1511	0	0.22594	-140.962	40.9061	-15.0875	-144.567	33.2371	-18.5384	-137.122	48.9888	-13.1799	-0.97052	0.22444	-0.0878	-0.97759	0.18778	-0.09517
C	77	0.1809	0.06424	0.21243	-137.682	40.1474	-14.7908	-140.191	35.6147	-22.3322	-134.803	45.8795	-8.26604	-0.97052	0.22444	-0.0878	-0.97877	0.17602	-0.10498
A	78	0.21348	0.06424	0.19583	-134.402	39.3888	-14.494	-135.64	39.7562	-23.5519	-132.789	40.5871	-5.56778	-0.97052	0.22444	-0.0878	-0.9768	0.17368	-0.1253
A	79	0.2542	0.06424	0.17932	-131.054	39.1313	-14.1004	-131.875	44.3737	-21.5541	-130.221	35.2876	-5.83925	-0.99027	0.07618	-0.11646	-0.97269	0.17775	-0.14927
T	80	0.30368	0.07953	0.16298	-127.707	38.8738	-13.7068	-128.733	47.1738	-17.418	-126.788	31.3495	-8.5829	-0.99027	0.07618	-0.11646	-0.96672	0.18916	-0.17224
A	81	0.35761	0.12222	0.14672	-124.36	38.6163	-13.3131	-125.985	47.4514	-11.5766	-122.938	29.5792	-13.4601	-0.99027	0.07618	-0.11646	-0.95867	0.20793	-0.19422
A	82	0.37964	0.12222	0.13426	-121.122	38.1601	-12.4574	-124.001	44.4227	-6.44032	-118.691	30.8237	-17.3542	-0.95796	0.13498	-0.25317	-0.94971	0.22661	-0.21612
A	83	0.36921	0.1684	0.12915	-118.048	37.2771	-11.3649	-122.598	38.9884	-3.61357	-114.007	34.0468	-18.9114	-0.90955	0.26123	-0.32324	-0.93985	0.24514	-0.23789
T	84	0.36161	0.1224	0.12913	-114.974	36.3942	-10.2723	-120.479	33.4812	-3.5701	-109.674	37.8287	-17.5913	-0.90955	0.26123	-0.32324	-0.92747	0.2708	-0.25782
T	85	0.32633	0.06424	0.1336	-112.054	35.0266	-9.25831	-118.272	28.8637	-6.59905	-105.769	40.3228	-13.2789	-0.86387	0.40463	-0.30001	-0.91214	0.3033	-0.27569
C	86	0.29098	0.06424	0.14115	-109.134	33.6589	-8.24426	-114.002	26.3998	-10.9499	-103.725	40.9432	-7.06045	-0.86387	0.40463	-0.30001	-0.89547	0.33508	-0.293
A	87	0.25589	0	0.14878	-106.214	32.2912	-7.23022	-108.689	26.9535	-14.2373	-102.95	38.4862	-1.34111	-0.86387	0.40463	-0.30001	-0.88073	0.36371	-0.30336
C	88	0.2215	0	0.15649	-103.294	30.9236	-6.21618	-103.144	29.667	-15.2778	-102.683	33.567	2.52185	-0.86387	0.40463	-0.30001	-0.87201	0.38369	-0.30395
G	89	0.17104	0	0.16202	-100.374	29.556	-5.20214	-98.4717	32.4896	-13.6572	-101.758	28.0783	3.72074	-0.86387	0.40463	-0.30001	-0.86663	0.39768	-0.30134
T	90	0.12144	0	0.16532	-97.4545	28.1883	-4.1881	-94.7632	35.2051	-9.40689	-100.071	22.2325	2.24603	-0.86387	0.40463	-0.30001	-0.86387	0.40463	-0.30001
G	91	0.06243	0	0.16764	-94.5346	26.8207	-3.17406	-92.629	35.7623	-3.53462	-96.8374	18.1715	-1.27557	-0.86387	0.40463	-0.30001	-0.86387	0.40463	-0.30001
G	92	0.02459	0	0.1656	-91.6148	25.453	-2.16002	-91.7366	33.5255	2.14519	-92.2171	16.8214	-5.13428	-0.86387	0.40463	-0.30001	-0.86387	0.40463	-0.30001
T	93	0.04408	0	0.15896	-88.6949	24.0854	-1.14597	-91.4621	28.7714	6.20915	-86.7346	18.1656	-7.84137	-0.86387	0.40463	-0.30001	-0.86387	0.40463	-0.30001
G	94	0.07715	0	0.15456	-85.775	22.7177	-0.13193	-90.8535	22.6586	7.47856	-81.3031	21.3002	-7.98732	-0.86387	0.40463	-0.30001	-0.86387	0.40463	-0.30001
A	95	0.09526	0	0.1506	-82.8551	21.3501	0.88211	-89.1146	16.6091	5.57859	-76.7553	24.9279	-4.9235	-0.86387	0.40463	-0.30001	-0.86387	0.40463	-0.30001
T	96	0.11599	0	0.14579	-79.9353	19.9824	1.89615	-85.7869	12.963	2.34531	-73.8029	26.4857	-0.05743	-0.86387	0.40463	-0.30001	-0.86448	0.39928	-0.30537
C	97	0.13814	0	0.14424	-77.0154	18.6148	2.91019	-80.8994	11.883	-1.91809	-72.4484	25.7647	6.33592	-0.86387	0.40463	-0.30001	-0.86555	0.3885	-0.31606
C	98	0.1611	0	0.14609	-74.0955	17.2471	3.92423	-75.4266	13.4523	-4.29414	-71.9509	22.1753	11.3288	-0.86387	0.40463	-0.30001	-0.86642	0.37762	-0.32669
T	99	0.17592	0.06424	0.15434	-71.1756	15.8795	4.93828	-70.4851	15.7305	-4.18398	-71.1509	17.4721	13.9481	-0.86387	0.40463	-0.30001	-0.86709	0.36663	-0.33726
A	100	0.191	0.06424	0.16854	-68.2558	14.5118	5.95232	-65.8444	19.3058	-1.45831	-70.3163	11.069	14.1752	-0.86387	0.40463	-0.30001	-0.86376	0.36086	-0.3517
A	101	0.17129	0.06424	0.18476	-65.3269	13.5205	7.31743	-63.3007	21.7045	3.76344	-67.6987	6.16455	12.2143	-0.86652	0.2933	-0.40388	-0.85634	0.36028	-0.36998
G	102	0.16478	0.06424	0.20149	-62.3981	12.5291	8.68255	-61.8626	21.6571	9.01231	-63.5781	3.52862	9.82818	-0.86652	0.2933	-0.40388	-0.84857	0.35955	-0.38814
C	103	0.1776	0.06424	0.21419	-59.4692	11.5378	10.0477	-61.9126	18.6283	15.2888	-57.8309	3.55583	5.88614	-0.86652	0.2933	-0.40388	-0.84046	0.35868	-0.40616
T	104	0.20781	0.06424	0.22094	-56.5404	10.5465	11.4128	-60.956	14.3244	18.4799	-52.8173	5.39319	4.83274	-0.86652	0.2933	-0.40388	-0.83624	0.35318	-0.41948
T	105	0.23276	0.06424	0.22302	-53.8932	9.20802	13.0331	-60.6757	8.41888	19.1232	-47.5624	8.5227	6.463	-0.78319	0.39599	-0.47938	-0.83603	0.34311	-0.42816
C	106	0.26249	0.06424	0.2212	-51.246	7.86957	14.6534	-58.2171	2.58746	17.3401	-44.0977	12.0683	10.7821	-0.78319	0.39599	-0.47938	-0.83596	0.33875	-0.43175
C	107	0.29539	0.06424	0.21799	-48.5989	6.53112	16.2737	-53.8597	-0.74602	14.5185	-42.6424	13.4681	16.6116	-0.78319	0.39599	-0.47938	-0.83743	0.33321	-0.43322
A	108	0.33018	0.06424	0.21535	-45.9517	5.19267	17.894	-48.2042	-1.30959	11.864	-42.7157	12.2322	22.761	-0.78319	0.39599	-0.47938	-0.83869	0.31619	-0.44342
A	109	0.36135	0.06424	0.21089	-43.017	4.15499	19.2113	-42.5835	1.18425	10.5683	-42.7257	8.4516	27.284	-0.86825	0.30701	-0.38973	-0.83446	0.29409	-0.46605
C	110	0.39227	0.10771	0.2036	-40.0823	3.1173	20.5286	-37.8872	5.1129	11.8733	-41.8724	2.65502	29.4894	-0.86825	0.30701	-0.38973	-0.82957	0.26584	-0.49106
T	111	0.44183	0.12234	0.19401	-37.1476	2.07962	21.8459	-34.5374	7.81062	15.2083	-39.7206	-2.34374	29.4306	-0.86825	0.30701	-0.38973	-0.82743	0.23171	-0.51153
T	112	0.45801	0.16852	0.18278	-34.1655	1.52419	23.3367	-33.5114	10.2145	20.5502	-35.388	-6.53312	27.496	-0.8823	0.16433	-0.44107	-0.82397	0.19709	-0.53126
T	113	0.43909	0.16852	0.17152	-31.3473	1.29668	25.1888	-33.9862	9.96278	26.473	-29.596	-7.68367	25.2168	-0.83379	0.06731	-0.54796	-0.81918	0.16215	-0.55014
T	114	0.39315	0.12234	0.16025	-28.8402	1.11433	27.4484	-34.8195	6.78208	31.4284	-23.6566	-5.71663	24.2574	-0.74173	0.05395	-0.66853	-0.80904	0.13161	-0.57282
C	115	0.34505	0.06424	0.14794	-26.3332	0.93198	29.7081	-33.8277	1.31436	34.9427	-19.0336	-1.0513	24.5605	-0.74173	0.05395	-0.66853	-0.79362	0.10557	-0.59919
C	116	0.2914	0	0.13634	-23.8262	0.74963	31.9677	-30.6205	-3.84363	36.024	-16.6033	3.90251	27.3197	-0.74173	0.05395	-0.66853	-0.77705	0.07956	-0.62439
A	117	0.25029	0	0.12415	-21.3191	0.56728	34.2273	-25.5745	-7.47526	35.1883	-16.1471	7.83363	32.1867	-0.74173	0.05395	-0.66853	-0.76011	0.06098	-0.64693
T	118	0.22971	0	0.1109	-18.8121	0.38493	36.487	-19.8855	-8.3148	33.8646	-16.6555	9.16147	37.9138	-0.74173	0.05395	-0.66853	-0.74674	0.05465	-0.66287
G	119	0.19743	0	0.09763	-16.3051	0.20258	38.7466	-14.0867	-6.25212	32.6531	-17.6233	7.63301	43.9201	-0.74173	0.05395	-0.66853	-0.74173	0.05395	-0.66853
T	120	0.17318	0	0.08082	-13.798	0.02023	41.0062	-9.61378	-1.89467	33.098	-17.5801	3.46567	48.5917	-0.74173	0.05395	-0.66853	-0.73797	0.05942	-0.67222
G	121	0.16125	0	0.06431	-11.291	-0.16212	43.2659	-7.14723	3.18628	35.8273	-15.673	-1.96128	51.0937	-0.74173	0.05395	-0.66853	-0.72923	0.0778	-0.67983
G	122	0.15735	0	0.05245	-8.78395	-0.34447	45.5255	-6.6127	7.05576	40.6024	-11.7393	-6.70375	51.4025	-0.74173	0.05395	-0.66853	-0.71888	0.10369	-0.68735
T	123	0.15761	0.06424	0.04827	-6.27692	-0.52682	47.7851	-7.40019	8.48193	46.6471	-6.22287	-9.37259	50.1226	-0.74173	0.05395	-0.66853	-0.70788	0.12961	-0.69434
A	124	0.15996	0.12222	0.0613	-3.76989	-0.70917	50.0448	-8.4772	6.65526	52.7505	-0.02967	-8.88483	48.3466	-0.74173	0.05395	-0.66853	-0.70173	0.15459	-0.69547
A	125	0.15342	0.12222	0.08586	-1.54456	-1.25935	52.5286	-8.84823	2.00928	56.9656	5.09763	-5.97607	48.3635	-0.65838	0.16277	-0.73487	-0.70514	0.17335	-0.68755
A	126	0.15573	0.12222	0.11148	0.5423	-2.30376	54.9738	-7.74927	-3.99687	58.4519	8.74583	-2.11947	50.9262	-0.61741	0.309	-0.72341	-0.71468	0.17939	-0.67605
C	127	0.19444	0.0783	0.13561	2.62915	-3.34817	57.4189	-4.35215	-9.23481	57.9875	10.2539	1.45615	55.8387	-0.61741	0.309	-0.72341	-0.72591	0.17795	-0.66437
A	128	0.24234	0.12222	0.1613	4.716	-4.39258	59.864	1.04916	-12.1903	56.7876	9.5336	3.13051	61.841	-0.61741	0.309	-0.72341	-0.73698	0.17646	-0.65247
A	129	0.27234	0.16806	0.19205	7.17735	-5.37632	61.9612	7.1988	-11.8851	55.5308	8.24803	1.86327	67.4527	-0.72821	0.29105	-0.62049	-0.74789	0.17492	-0.64037
A	130	0.29473	0.16806	0.22178	9.92795	-6.00611	63.8219	12.4949	-8.50493	55.4028	7.96247	-2.06283	71.8407	-0.81379	0.18633	-0.55048	-0.76272	0.16777	-0.62458
A	131	0.32955	0.12222	0.24878	12.7672	-6.12983	65.6515	15.7218	-3.49687	57.4021	9.68717	-7.18113	74.2027	-0.84002	0.0366	-0.54131	-0.7803	0.15468	-0.60598
T	132	0.3696	0.06424	0.27476	15.6065	-6.25354	67.4811	17.2813	0.45905	61.4936	13.3716	-11.7855	74.4178	-0.84002	0.0366	-0.54131	-0.797	0.14844	-0.58545
G	133	0.41002	0	0.29366	18.4458	-6.37725	69.3108	17.5847	2.53049	67.4068	18.4636	-14.9353	72.5471	-0.84002	0.0366	-0.54131	-0.81362	0.14925	-0.56191
T	134	0.45028	0.06424	0.30371	21.2851	-6.50096	71.1404	17.5842	1.50252	73.5822	24.1557	-15.1061	69.9465	-0.84002	0.0366	-0.54131	-0.82818	0.15524	-0.53853
A	135	0.48059	0.12222	0.3121	24.1244	-6.62467	72.9701	18.1976	-2.51834	78.6026	29.544	-12.0981	68.0321	-0.84002	0.0366	-0.54131	-0.84124	0.17143	-0.51276
A	136	0.50116	0.12222	0.32378	26.8384	-7.23971	74.8884	19.8852	-8.17349	80.7617	33.6076	-7.89123	68.7672	-0.80298	0.18196	-0.56755	-0.85571	0.19523	-0.47921
A	137	0.49884	0.1684	0.33785	29.5476	-8.32356	76.5942	22.8191	-13.6432	79.779	36.4933	-4.17613	72.3198	-0.80154	0.32067	-0.50469	-0.87261	0.21405	-0.43902
T	138	0.51325	0.16863	0.35002	32.2568	-9.40741	78.3001	27.1433	-16.953	77.5057	38.0472	-2.34771	77.7109	-0.80154	0.32067	-0.50469	-0.88991	0.2251	-0.39673
T	139	0.53008	0.16852	0.35416	35.081	-10.7542	79.5786	31.961	-17.3346	74.0399	39.026	-3.67315	83.8224	-0.83554	0.39846	-0.37827	-0.90529	0.23569	-0.3534
T	140	0.52313	0.19789	0.35066	38.0957	-12.0547	80.3814	36.856	-14.8461	71.7566	40.0643	-7.9867	88.3369	-0.89195	0.38475	-0.23749	-0.91865	0.24575	-0.30933
T	141	0.50778	0.16852	0.34236	41.3022	-13.0176	80.846	41.0931	-10.6802	72.0025	41.9371	-13.8171	89.9384	-0.94865	0.28489	-0.13747	-0.92942	0.25241	-0.26919
T	142	0.48662	0.12234	0.3334	44.6262	-13.484	81.2428	44.1943	-6.68676	75.1334	45.0928	-19.0988	88.4519	-0.98345	0.138	-0.1174	-0.9391	0.24901	-0.23683
G	143	0.44945	0.06424	0.32988	47.9503	-13.9504	81.6396	47.2601	-4.92372	80.3143	48.5045	-22.6129	84.5326	-0.98345	0.138	-0.1174	-0.94874	0.24324	-0.20181
G	144	0.41173	0.06424	0.32954	51.2744	-14.4169	82.0364	49.8707	-6.17856	85.7613	52.4212	-23.2156	79.8044	-0.98345	0.138	-0.1174	-0.95791	0.23843	-0.15988
T	145	0.37395	0.06424	0.327	54.5984	-14.8833	82.4332	52.2457	-10.1982	89.9319	56.6601	-20.8772	75.8349	-0.98345	0.138	-0.1174	-0.965	0.23092	-0.12433
T	146	0.36293	0.07939	0.32268	57.7925	-15.6635	83.2168	53.5615	-15.8274	91.3277	61.655	-17.0708	75.0428	-0.94497	0.23083	-0.23182	-0.96966	0.22521	-0.0951
A	147	0.35884	0.10375	0.31837	60.9865	-16.4437	84.0003	56.1101	-21.5663	89.805	65.7875	-12.6074	77.2219	-0.94497	0.23083	-0.23182	-0.97152	0.22765	-0.06579
A	148	0.32826	0.12222	0.31383	64.1663	-17.5287	84.3693	59.2173	-25.1163	85.6538	69.1411	-10.3923	81.5343	-0.94077	0.321	-0.10916	-0.97164	0.23249	-0.04321
A	149	0.27789	0.1684	0.31079	67.365	-18.6108	84.2239	62.6705	-25.4793	80.416	72.1815	-11.1791	86.523	-0.94639	0.32016	0.04302	-0.97226	0.23241	-0.02648
T	150	0.24885	0.1224	0.3092	70.5638	-19.693	84.0785	66.7536	-23.4627	76.6633	74.743	-14.6997	90.5062	-0.94639	0.32016	0.04302	-0.97261	0.23226	-0.00975
T	151	0.20313	0.07939	0.30701	73.8059	-20.4693	83.5213	70.51	-19.1281	75.0921	77.4699	-20.2388	91.9021	-0.9592	0.2297	0.16485	-0.97378	0.22715	0.01274
A	152	0.19609	0.07939	0.29996	77.048	-21.2457	82.9642	75.2685	-14.9976	76.5214	79.2841	-26.2305	90.3035	-0.9592	0.2297	0.16485	-0.97531	0.21701	0.04088
A	153	0.21713	0.06424	0.28983	80.3922	-21.7092	82.8027	79.4171	-12.852	80.7257	81.5129	-30.0462	86.4017	-0.9894	0.13712	0.04777	-0.97728	0.20246	0.0627
G	154	0.24125	0.06424	0.28142	83.7364	-22.1726	82.6412	82.9663	-13.321	84.8251	84.5499	-31.267	82.0535	-0.9894	0.13712	0.04777	-0.98043	0.18375	0.07072
T	155	0.26757	0	0.274	87.0806	-22.6361	82.4798	86.1549	-16.4825	89.1873	87.9119	-29.8833	76.9569	-0.9894	0.13712	0.04777	-0.98369	0.1652	0.07113
A	156	0.2778	0	0.26827	90.4247	-23.0995	82.3183	88.915	-21.9416	91.2679	91.7319	-25.8286	73.6836	-0.9894	0.13712	0.04777	-0.98633	0.15123	0.06543
C	157	0.29042	0	0.25967	93.7689	-23.563	82.1569	91.5013	-27.5195	90.089	95.8027	-21.0733	73.5907	-0.9894	0.13712	0.04777	-0.98893	0.13622	0.05876
T	158	0.29784	0	0.24452	97.1131	-24.0265	81.9954	94.2761	-31.0946	87.0656	99.7509	-17.9602	75.6742	-0.9894	0.13712	0.04777	-0.99156	0.11284	0.06389
C	159	0.31075	0	0.22506	100.457	-24.4899	81.834	97.1562	-33.0157	81.476	103.673	-16.0165	80.58	-0.9894	0.13712	0.04777	-0.99337	0.08654	0.07573
A	160	0.32373	0.06424	0.20607	103.801	-24.9534	81.6725	100.516	-31.6396	76.3607	107.14	-17.4046	85.6199	-0.9894	0.13712	0.04777	-0.99435	0.06003	0.08757
T	161	0.35308	0.12234	0.18952	107.146	-25.4168	81.511	104.255	-28.2477	73.3047	110.201	-21.1465	89.0037	-0.9894	0.13712	0.04777	-0.99449	0.03338	0.09937
T	162	0.34787	0.12234	0.17552	110.487	-25.4964	81.0067	107.202	-23.1063	72.8084	113.851	-26.2966	89.4778	-0.98852	0.02355	0.14922	-0.99379	0.00665	0.11112
T	163	0.33146	0.12234	0.16106	113.793	-25.0648	80.4536	109.959	-18.4984	75.3652	117.675	-30.5071	86.7008	-0.97822	-0.1277	0.16364	-0.99223	-0.02008	0.12276
C	164	0.31462	0.06424	0.1438	117.1	-24.6331	79.9005	113.88	-16.0699	80.0503	120.556	-32.9827	81.334	-0.97822	-0.1277	0.16364	-0.98984	-0.04674	0.13428
G	165	0.29743	0	0.12691	120.406	-24.2015	79.3474	118.049	-16.6168	83.8898	123.086	-32.3897	76.2678	-0.97822	-0.1277	0.16364	-0.98662	-0.07328	0.14565
A	166	0.27996	0	0.10737	123.712	-23.7698	78.7943	122.514	-20.194	87.1305	125.223	-28.7192	71.2486	-0.97822	-0.1277	0.16364	-0.98259	-0.09962	0.15684
C	167	0.24338	0	0.0886	127.019	-23.3382	78.2412	126.606	-24.9305	87.2417	127.619	-23.3449	69.1114	-0.97822	-0.1277	0.16364	-0.97928	-0.12021	0.163
T	168	0.18928	0	0.07703	130.325	-22.9066	77.6882	130.14	-28.4081	84.9966	130.547	-18.7762	69.5269	-0.97822	-0.1277	0.16364	-0.97676	-0.13433	0.16704
G	169	0.12822	0	0.07254	133.632	-22.4749	77.1351	133.14	-31.0878	80.1832	133.965	-14.5229	72.6218	-0.97822	-0.1277	0.16364	-0.97365	-0.14759	0.17384
G	170	0.07789	0	0.07561	136.938	-22.0433	76.582	135.622	-30.8643	74.5397	137.958	-12.9633	77.0578	-0.97822	-0.1277	0.16364	-0.97032	-0.16083	0.1806
A	171	0.06967	0.06424	0.08702	140.244	-21.6116	76.0289	137.761	-27.39	69.3838	142.397	-14.677	81.596	-0.97822	-0.1277	0.16364	-0.96675	-0.17405	0.18733
T	172	0.10912	0.06424	0.10407	143.551	-21.18	75.4758	140.196	-22.5373	67.0724	146.65	-18.2576	83.5732	-0.97822	-0.1277	0.16364	-0.96495	-0.18119	0.18983
T	173	0.16365	0.06424	0.12208	146.722	-20.3052	74.6986	141.854	-16.8672	67.7557	151.359	-22.3	82.3293	-0.93816	-0.25882	0.22993	-0.96642	-0.17479	0.18835
A	174	0.22578	0.06424	0.1396	149.893	-19.4304	73.9215	144.991	-12.2654	71.0321	154.909	-25.7761	78.198	-0.93816	-0.25882	0.22993	-0.96915	-0.15491	0.1917
C	175	0.28999	0.06424	0.15835	153.064	-18.5556	73.1443	149.186	-10.5696	75.3583	157.345	-26.6156	72.4924	-0.93816	-0.25882	0.22993	-0.97138	-0.12881	0.19957
A	176	0.3543	0.12222	0.17789	156.235	-17.6808	72.3671	154.06	-11.8655	79.0879	158.961	-24.4397	66.8353	-0.93816	-0.25882	0.22993	-0.97289	-0.10243	0.20735
A	177	0.39055	0.16806	0.19792	159.545	-17.2132	71.872	158.576	-15.8572	80.8684	160.793	-20.1074	63.2824	-0.97949	-0.13833	0.14647	-0.97366	-0.07582	0.21502
A	178	0.39021	0.16806	0.21818	162.888	-17.2594	71.3716	161.975	-21.0046	79.6695	163.699	-15.0331	62.5341	-0.98888	0.01365	0.14807	-0.97481	-0.04233	0.21897
A	179	0.3758	0.12222	0.23565	166.141	-17.7209	70.5803	164.116	-25.175	75.4842	167.731	-11.1604	64.4039	-0.96258	0.13653	0.23409	-0.97571	-0.00211	0.21904
T	180	0.37383	0.06424	0.24713	169.395	-18.1823	69.7891	166.111	-26.7148	70.1486	172.288	-9.71843	67.864	-0.96258	0.13653	0.23409	-0.97504	0.03791	0.21875
A	181	0.37213	0	0.25557	172.648	-18.6438	68.9979	168.406	-25.244	64.2906	176.69	-11.1595	72.3684	-0.96258	0.13653	0.23409	-0.97283	0.07756	0.21812
T	182	0.37525	0	0.26188	175.902	-19.1053	68.2066	171.519	-21.8047	60.6426	180.318	-14.9553	75.0613	-0.96258	0.13653	0.23409	-0.96879	0.11081	0.22173
G	183	0.36967	0	0.26504	179.155	-19.5668	67.4154	175.418	-17.0363	59.4566	183.167	-20.5194	75.5831	-0.96258	0.13653	0.23409	-0.96443	0.13046	0.22992
T	184	0.37069	0	0.26726	182.409	-20.0283	66.6242	179.923	-13.0682	61.2302	185.313	-25.8364	73.0696	-0.96258	0.13653	0.23409	-0.96093	0.14347	0.2367
G	185	0.37817	0	0.26959	185.662	-20.4897	65.8329	184.602	-11.4334	65.0758	187.14	-29.2256	68.1172	-0.96258	0.13653	0.23409	-0.95527	0.16116	0.24797
G	186	0.39146	0	0.27205	188.916	-20.9512	65.0417	188.93	-12.8248	69.246	189.175	-29.6799	62.3109	-0.96258	0.13653	0.23409	-0.94672	0.18266	0.26524
C	187	0.40957	0.06424	0.27372	192.169	-21.4127	64.2505	192.566	-17.7246	72.6144	191.762	-26.515	56.6666	-0.96258	0.13653	0.23409	-0.9353	0.20335	0.2896
A	188	0.43956	0.12222	0.27201	195.423	-21.8742	63.4592	195.24	-23.3974	72.4793	195.349	-21.9403	54.3102	-0.96258	0.13653	0.23409	-0.92042	0.22315	0.32097
A	189	0.4569	0.12222	0.26467	198.529	-22.7996	62.5007	196.623	-28.6314	69.2883	199.801	-18.1015	54.7531	-0.91902	0.2738	0.28361	-0.90398	0.2427	0.35202
A	190	0.43873	0.1684	0.25415	201.401	-23.9675	61.1534	197.075	-31.5953	63.7656	204.972	-16.5663	57.131	-0.84955	0.34554	0.39858	-0.88603	0.26191	0.38257
T	191	0.42123	0.1224	0.24364	204.272	-25.1354	59.8062	198.264	-31.792	57.9888	209.845	-17.889	60.1846	-0.84955	0.34554	0.39858	-0.86665	0.28068	0.41248
T	192	0.37237	0.06424	0.23316	206.913	-26.232	58.0043	199.731	-28.9008	53.0033	214.04	-22.2215	62.1079	-0.78138	0.32442	0.53311	-0.84594	0.29893	0.44161
A	193	0.32258	0.06424	0.22411	209.554	-27.3285	56.2024	203.551	-24.8114	49.773	216.105	-28.3308	62.5115	-0.78138	0.32442	0.53311	-0.82404	0.31657	0.46984
G	194	0.27216	0	0.21819	212.195	-28.4251	54.4005	208.287	-22.2961	48.844	216.981	-33.3046	60.4832	-0.78138	0.32442	0.53311	-0.80465	0.32724	0.49543
G	195	0.2215	0	0.2145	214.836	-29.5216	52.5986	214.122	-20.7454	50.1124	216.556	-37.7453	56.2219	-0.78138	0.32442	0.53311	-0.79278	0.32807	0.51369
G	196	0.17104	0	0.21156	217.477	-30.6182	50.7967	219.651	-21.9128	52.587	216.099	-39.6534	50.373	-0.78138	0.32442	0.53311	-0.78522	0.32566	0.52667
T	197	0.12144	0	0.20745	220.119	-31.7147	48.9948	223.922	-25.8588	54.9074	216.622	-38.6855	44.21	-0.78138	0.32442	0.53311	-0.78138	0.32442	0.53311
G	198	0.07427	0	0.20439	222.76	-32.8113	47.193	226.29	-31.6317	55.5512	218.938	-35.5012	39.3269	-0.78138	0.32442	0.53311	-0.78138	0.32442	0.53311
A	199	0.03851	0	0.20584	225.401	-33.9078	45.391	226.648	-37.8807	53.5382	223.341	-31.2805	36.8722	-0.78138	0.32442	0.53311	-0.78138	0.32442	0.53311
T	200	0.01923	0	0.20895	228.042	-35.0044	43.5891	226.378	-41.9659	49.2885	228.701	-28.812	36.8858	-0.78138	0.32442	0.53311	-0.78138	0.32442	0.53311
C	201	0	0	0.21246	230.683	-36.1009	41.7873	225.688	-43.6741	42.9769	234.823	-28.3504	39.2382	-0.78138	0.32442	0.53311	-0.78138	0.32442	0.53311
G	202	0	0	0.21503	233.324	-37.1975	39.9853	226.576	-42.8186	37.4182	239.596	-30.6683	41.3041	-0.78138	0.32442	0.53311	-0.78138	0.32442	0.53311
C	203	0.01923	0	0.21696	235.965	-38.294	38.1835	229.025	-38.8407	32.246	243.113	-36.262	43.5216	-0.78138	0.32442	0.53311	-0.78138	0.32442	0.53311
G	204	0.05515	0	0.2187	238.606	-39.3905	36.3815	233.181	-35.6314	30.0446	244.701	-41.6831	42.8087	-0.78138	0.32442	0.53311	-0.78138	0.32442	0.53311
A	205	0.10327	0	0.21737	241.247	-40.4871	34.5797	239.021	-32.6364	30.4412	244.461	-47.4219	39.6089	-0.78138	0.32442	0.53311	-0.78138	0.32442	0.53311
C	206	0.15757	0	0.21455	243.888	-41.5836	32.7777	244.89	-32.4906	32.6147	243.814	-50.6118	34.2612	-0.78138	0.32442	0.53311	-0.78138	0.32442	0.53311
G	207	0.21106	0	0.21314	246.529	-42.6802	30.9759	249.619	-34.9025	34.6736	244.048	-51.1601	28.5987	-0.78138	0.32442	0.53311	-0.78138	0.32442	0.53311
T	208	0.26927	0	0.21338	249.17	-43.7767	29.174	253.1	-39.8043	36.4188	245.289	-49.0951	22.8204	-0.78138	0.32442	0.53311	-0.7771	0.3243	0.53939
C	209	0.32952	0	0.21295	251.811	-44.8733	27.3721	254.489	-46.2184	36.017	248.568	-45.0384	18.818	-0.78138	0.32442	0.53311	-0.7661	0.3197	0.55757
G	210	0.37662	0	0.21391	254.452	-45.9698	25.5702	254.811	-51.1143	33.128	253.189	-42.0215	17.4137	-0.78138	0.32442	0.53311	-0.75275	0.30364	0.5841
A	211	0.42278	0.06424	0.21765	257.093	-47.0664	23.7683	253.935	-54.7057	27.6905	259.261	-39.813	18.6297	-0.78138	0.32442	0.53311	-0.7421	0.27332	0.61204
T	212	0.46777	0.12234	0.22174	259.734	-48.1629	21.9664	254.01	-55.2988	21.8199	264.713	-40.5837	20.7504	-0.78138	0.32442	0.53311	-0.73816	0.2314	0.63369
T	213	0.50923	0.16852	0.22333	262.058	-49.2395	19.76	254.275	-52.7387	16.4587	269.513	-44.4819	22.1032	-0.68736	0.31851	0.65276	-0.73748	0.18453	0.64967
T	214	0.51874	0.19789	0.22222	264.155	-49.9956	17.2199	256.23	-48.3506	12.9532	272.367	-50.0681	21.2551	-0.62064	0.22371	0.75151	-0.73495	0.13686	0.66416
T	215	0.4944	0.19789	0.22111	266.208	-50.2564	14.5474	260.113	-43.9745	11.8831	273.158	-55.2755	17.7448	-0.60735	0.07715	0.79068	-0.72851	0.09607	0.67827
T	216	0.45276	0.16852	0.21878	268.414	-50.0408	11.9957	265.403	-41.4456	12.8738	272.579	-58.1858	12.1537	-0.65269	-0.06377	0.75494	-0.7188	0.06263	0.69239
T	217	0.40034	0.12234	0.2174	270.912	-49.5547	9.7708	271.032	-41.8756	14.7439	271.86	-57.7803	5.87804	-0.73891	-0.14384	0.65827	-0.70819	0.02942	0.70541
G	218	0.34664	0.04499	0.21814	273.409	-49.0685	7.54585	276.507	-44.9189	15.0892	271.077	-54.5192	0.57701	-0.73891	-0.14384	0.65827	-0.69745	-0.00703	0.7166
A	219	0.29236	0.06424	0.21887	275.907	-48.5823	5.3209	280.367	-49.8947	13.201	271.593	-48.8676	-2.74307	-0.73891	-0.14384	0.65827	-0.69075	-0.04195	0.72188
A	220	0.26841	0.06424	0.21961	278.326	-48.5864	2.96025	281.441	-54.5698	9.14134	274.53	-43.8926	-3.91552	-0.71569	0.00121	0.69842	-0.68937	-0.0646	0.72152
T	221	0.24509	0.07953	0.22034	280.745	-48.5904	0.5996	280.995	-57.1401	3.84838	279.445	-40.6324	-3.72421	-0.71569	0.00121	0.69842	-0.69103	-0.0786	0.71854
A	222	0.20923	0.06424	0.2228	283.164	-48.5945	-1.76106	279.569	-56.9801	-2.45173	285.667	-39.8044	-2.18975	-0.71569	0.00121	0.69842	-0.68975	-0.08728	0.71877
A	223	0.15205	0.06424	0.2264	285.246	-48.3379	-4.41099	278.449	-53.5634	-7.6055	291.17	-41.8784	-1.78376	-0.6161	-0.07591	0.784	-0.68399	-0.09191	0.72368
G	224	0.11142	0.08206	0.22907	287.329	-48.0814	-7.06092	279.146	-49.334	-10.9591	295.167	-45.2552	-3.28078	-0.6161	-0.07591	0.784	-0.67817	-0.09654	0.72854
A	225	0.09049	0.06424	0.23141	289.411	-47.8248	-9.71085	281.844	-43.5644	-12.5919	297.439	-50.6212	-6.3264	-0.6161	-0.07591	0.784	-0.67341	-0.10844	0.73127
A	226	0.07184	0.06424	0.23423	291.714	-47.1828	-12.1003	286.651	-39.5623	-11.9896	297.693	-54.0391	-11.1225	-0.68129	-0.18994	0.70694	-0.66957	-0.12757	0.73171
G	227	0.06351	0.06424	0.23495	294.017	-46.5408	-14.4898	291.886	-38.2103	-11.3629	297.306	-54.8406	-16.4918	-0.68129	-0.18994	0.70694	-0.6633	-0.14007	0.73513
T	228	0.05523	0	0.23344	296.319	-45.8988	-16.8792	297.976	-39.4468	-10.6069	295.752	-53.2212	-22.3359	-0.68129	-0.18994	0.70694	-0.66001	-0.14217	0.73768
C	229	0.04704	0	0.23239	298.622	-45.2569	-19.2687	303.117	-43.4454	-11.5079	294.722	-48.5602	-26.8574	-0.68129	-0.18994	0.70694	-0.66198	-0.14046	0.73625
A	230	0.03099	0.06424	0.23384	300.925	-44.6149	-21.6581	305.94	-47.9861	-14.7882	295.821	-42.7775	-29.0259	-0.68129	-0.18994	0.70694	-0.66394	-0.13875	0.7348
T	231	0.02818	0.06424	0.23758	303.228	-43.9729	-24.0476	306.732	-51.2036	-19.6712	299.032	-37.8399	-29.3857	-0.68129	-0.18994	0.70694	-0.66269	-0.13133	0.73729
T	232	0.00564	0.06424	0.24145	305.376	-43.7739	-26.6491	304.832	-52.7722	-25.0841	304.7	-35.0255	-29.2415	-0.63573	-0.05886	0.76967	-0.65966	-0.12523	0.74106
A	233	0.02695	0.06424	0.2431	307.525	-43.575	-29.2506	302.816	-51.2168	-31.0223	311.098	-35.199	-28.3612	-0.63573	-0.05886	0.76967	-0.65812	-0.12616	0.74227
T	234	0.06787	0	0.24513	309.674	-43.376	-31.852	302.336	-47.4275	-35.5203	316.311	-37.9486	-28.6573	-0.63573	-0.05886	0.76967	-0.65658	-0.1271	0.74347
G	235	0.12683	0.06424	0.25285	311.823	-43.1771	-34.4535	303.654	-42.0177	-38.4093	319.998	-42.7264	-30.3692	-0.63573	-0.05886	0.76967	-0.65504	-0.12803	0.74467
T	236	0.20127	0.06424	0.26257	313.971	-42.9781	-37.055	307.373	-37.0703	-39.3509	321.28	-47.6066	-34.0749	-0.63573	-0.05886	0.76967	-0.65349	-0.12896	0.74587
T	237	0.25849	0.06424	0.29779	316.222	-42.3047	-39.4849	312.357	-34.1615	-37.915	321.16	-49.9945	-39.9358	-0.66592	-0.19924	0.71893	-0.65421	-0.13646	0.7439
C	238	0.31605	0.06424	0.34668	318.473	-41.6313	-41.9149	318.808	-34.1617	-36.6416	319.326	-49.6487	-46.2402	-0.66592	-0.19924	0.71893	-0.65159	-0.14918	0.74376
G	239	0.37337	0	0.39126	320.724	-40.9578	-44.3449	324.022	-36.3955	-37.1323	318.354	-46.7335	-51.0337	-0.66592	-0.19924	0.71893	-0.63783	-0.16378	0.75256
G	240	0.42994	0	0.43227	322.975	-40.2844	-46.7748	328.102	-40.5344	-39.2013	318.194	-41.6076	-54.463	-0.66592	-0.19924	0.71893	-0.61462	-0.1881	0.76607
G	241	0.48528	0.06424	0.47106	325.226	-39.611	-49.2048	329.998	-44.7285	-43.3096	320.103	-35.8988	-55.8145	-0.66592	-0.19924	0.71893	-0.58678	-0.22618	0.77751
A	242	0.53313	0.12222	0	327.476	-38.9376	-51.6348	329.511	-47.53	-49.2379	324.469	-31.0318	-55.1229	-0.66592	-0.19924	0.71893	-0.55599	-0.26439	0.78802
A	243	0.56047	0.16806	0	329.342	-38.3567	-54.393	327.284	-47.2433	-55.1071	330.053	-29.236	-54.5399	-0.55186	-0.17185	0.81604	-0.52246	-0.29531	0.79989
A	244	0.56975	0.1968	0	330.778	-37.5731	-57.3506	324.562	-43.8767	-59.6621	335.814	-30.2061	-55.3305	-0.42492	-0.23182	0.87504	-0.48762	-0.3257	0.81003
A	245	0.56347	0.16806	0	331.913	-36.3725	-60.2994	323.131	-38.2459	-62.0574	340.154	-33.0282	-58.1504	-0.33573	-0.35523	0.87241	-0.45168	-0.35536	0.81835
A	246	0.53335	0.12222	0	332.994	-34.7066	-63.0344	324.263	-32.0695	-62.3091	342.042	-36.05	-62.8464	-0.31986	-0.49286	0.80918	-0.4149	-0.3841	0.82482
T	247	0	0.06424	0	334.075	-33.0407	-65.7695	327.834	-27.373	-62.2138	341.368	-37.8922	-68.4118	-0.31986	-0.49286	0.80918	-0.37753	-0.41175	0.82942
A	248	0	0	0	335.156	-31.3749	-68.5045	333.706	-24.6855	-62.4329	338.111	-38.0762	-73.9887	-0.31986	-0.49286	0.80918	-0.3461	-0.44018	0.82853
G	249	0	0	0	336.237	-29.709	-71.2395	338.784	-24.261	-64.344	335.152	-35.8208	-77.9614	-0.31986	-0.49286	0.80918	-0.32046	-0.46786	0.82366
C	250	0	0	0	337.318	-28.0431	-73.9746	344.132	-26.852	-67.9853	331.334	-30.5389	-80.4305	-0.31986	-0.49286	0.80918	-0.29305	-0.49183	0.8199
G	251	0	0	0	338.399	-26.3773	-76.7096	346.17	-29.1713	-72.7693	330.71	-24.9749	-81.4655	-0.31986	-0.49286	0.80918	-0.26489	-0.50741	0.81998
T	252	0	0.06424	0	339.481	-24.7114	-79.4446	345.596	-31.4606	-78.5677	332.569	-19.0002	-81.2686	-0.31986	-0.49286	0.80918	-0.23343	-0.48358	0.77546
A	253	0	0.12222	0	340.562	-23.0455	-82.1797	342.426	-31.7749	-84.1892	337.285	-14.599	-80.9007	-0.31986	-0.49286	0.80918	-0.20144	-0.43429	0.69454
A	254	0	0.12222	0	341.147	-21.3647	-85.0531	337.986	-29.4389	-87.9736	342.761	-12.8298	-82.1784	-0.17325	-0.49728	0.85012	-0.16946	-0.38501	0.61362
A	255	0	0	0	341.286	-19.4467	-87.8327	334.003	-24.7752	-89.3432	347.505	-13.094	-85.6686	-0.04098	-0.56747	0.82238	-0.13747	-0.33572	0.5327
G	256	0	0	0	341.424	-17.5287	-90.6124	332.531	-19.5689	-89.9341	349.94	-14.1873	-90.4117	-0.04098	-0.56747	0.82238	-0.10549	-0.28644	0.45178
